# Supplementary material for: A simple two-step method to synthesize the well-ordered mesoporous composite Ti-FDU-12 and its application in the hydrodesulfurization of DBT and 4,6-DMDBT
Source: Royal Society of Chemistry journal article supplement (doi:10.1039/c4ta03691c), 2014-10-23
Supplement: c4ta03691c1.pdf [file c4ta03691c1.pdf]

### *Support Information*

A Simple Two-step Method to Synthesize Well Ordered Mesoporous Composite Ti-FDU-12 and Its Application in the Hydrodesulfurization of DBT and 4,6-DMDBT

Zhengkai Cao,<sup>a</sup> Aijun Duan,<sup>\*a</sup> Zhen Zhao,<sup>\*a</sup> Jianmei Li,<sup>b</sup> Yuechang Wei,<sup>a</sup> Guiyuan Jiang,<sup>a</sup> Jian Liu<sup>a</sup>

<sup>a</sup>State Key Laboratory of Heavy Oil Processing, China University of Petroleum, Beijing, 102249, P. R. China.

<sup>b</sup>College of Science, China University of Petroleum, Beijing 102249, P. R. China

✉\* Corresponding author: [duanaijun@cup.edu.cn](mailto:duanaijun@cup.edu.cn) and [zhenzhao@cup.edu.cn](mailto:zhenzhao@cup.edu.cn)

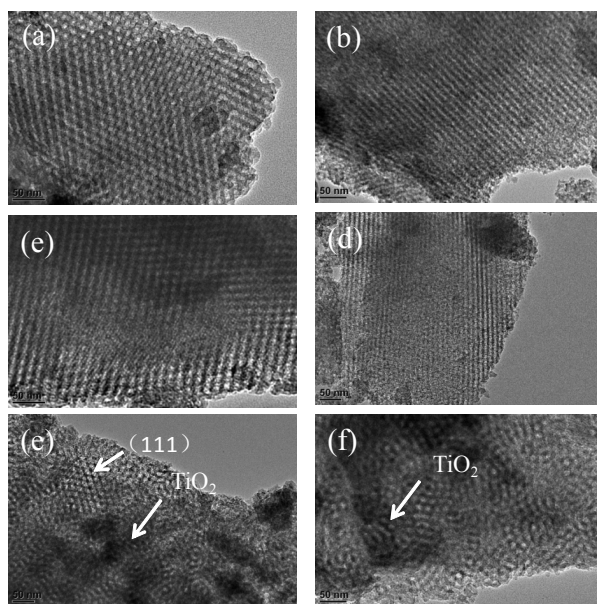

**Fig. S1.** TEM images of different samples (a) FDU-12 (b) ST-40 (c) ST-20 (d) ST-10 (d) ST-5 (e) ST-2.5.
